# Supplementary material for: Re-Sequencing Data for Refining Candidate Genes and Polymorphisms in QTL Regions Affecting Adiposity in Chicken
Source: PubMed Central journal article supplement (PMC4205046; doi:10.1371/journal.pone.0111299), 2014-10-21
Supplement: pone.0111299.s001.pdf [file pone.0111299.s001.pdf]

Nonsense SNPs

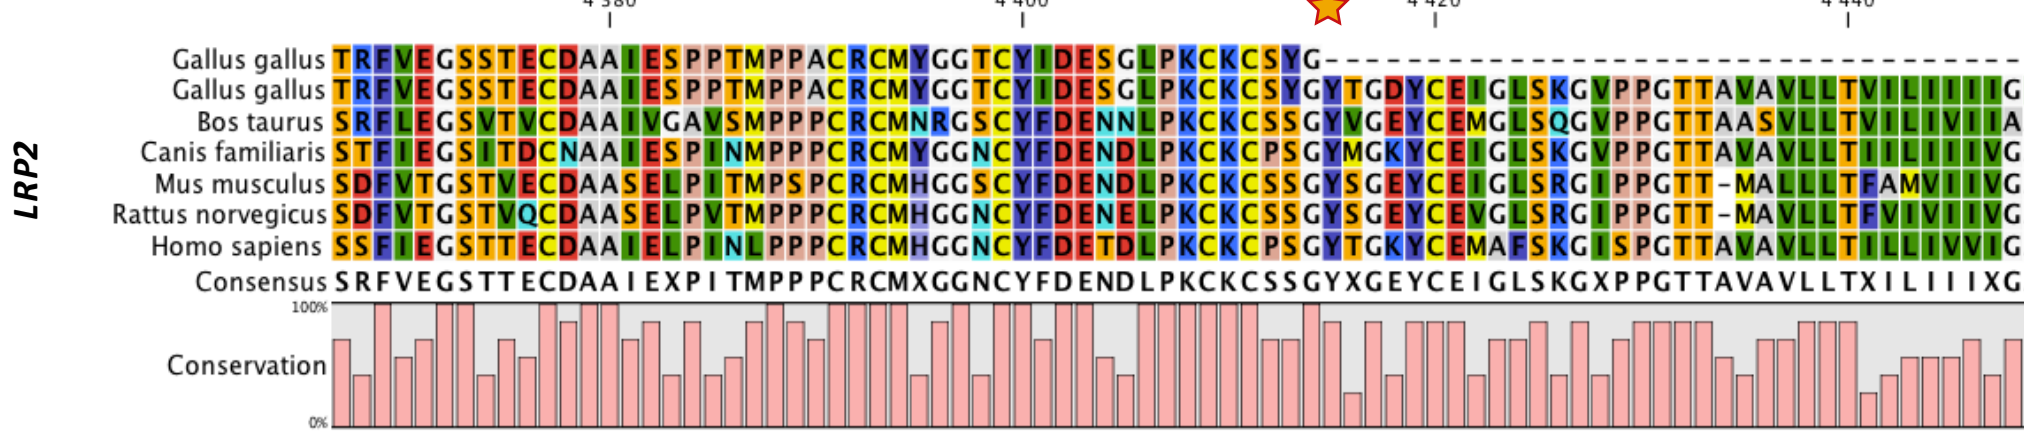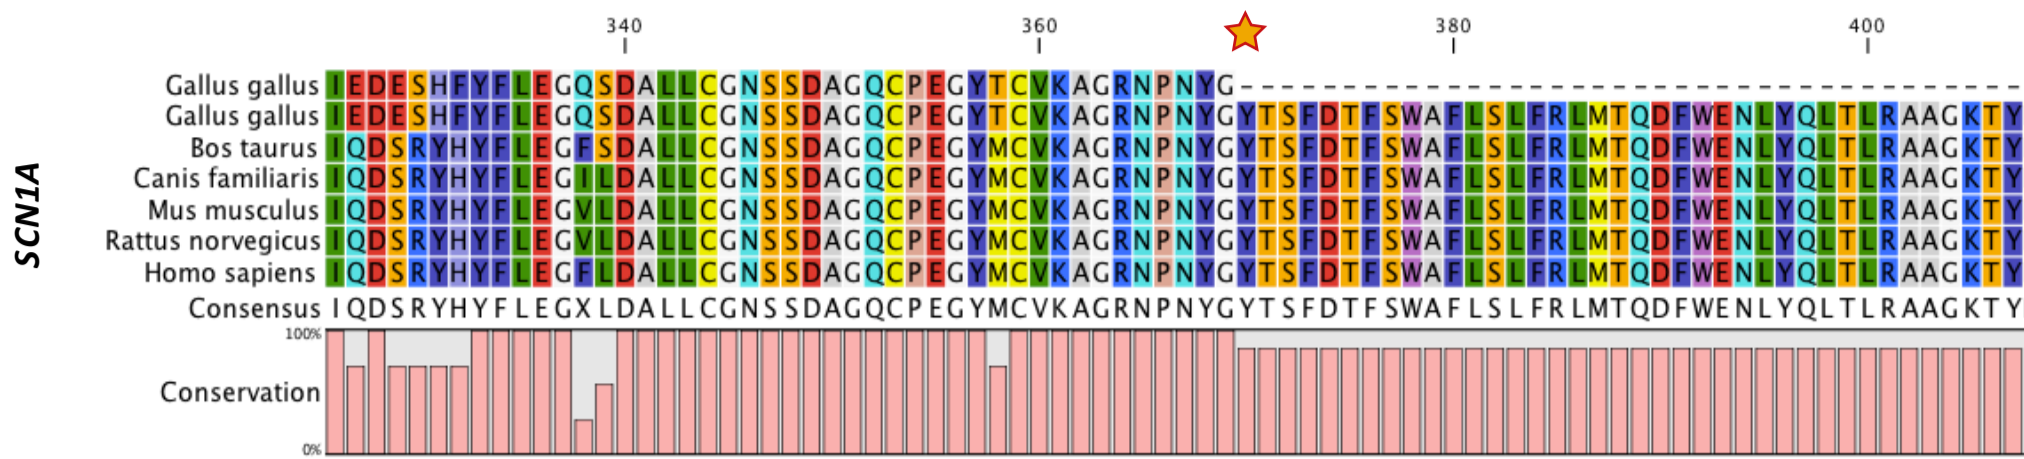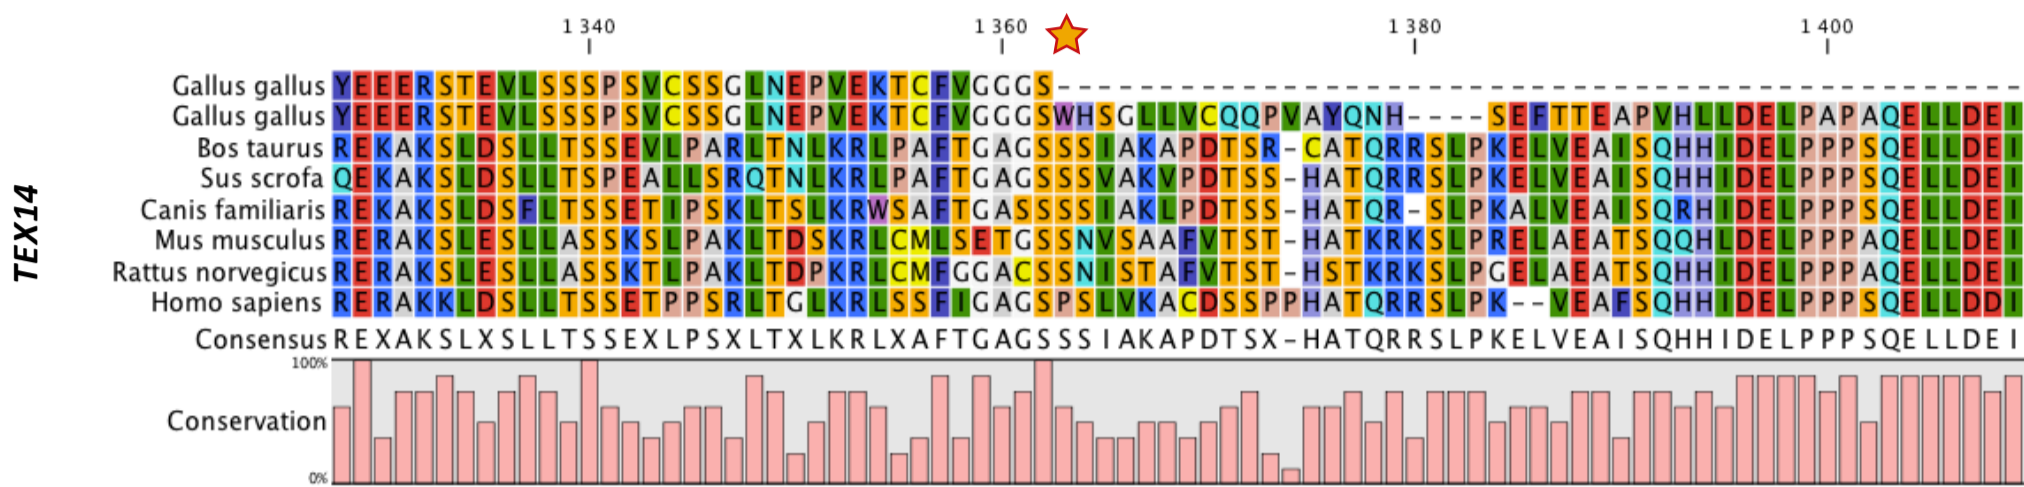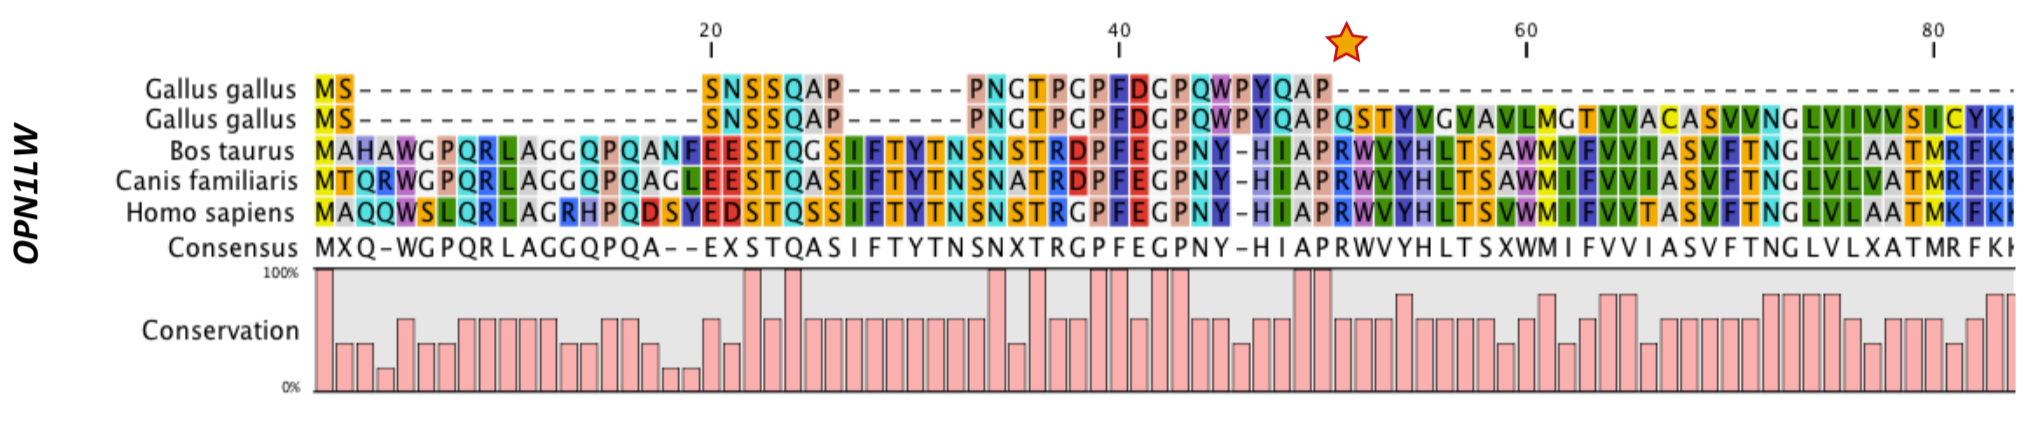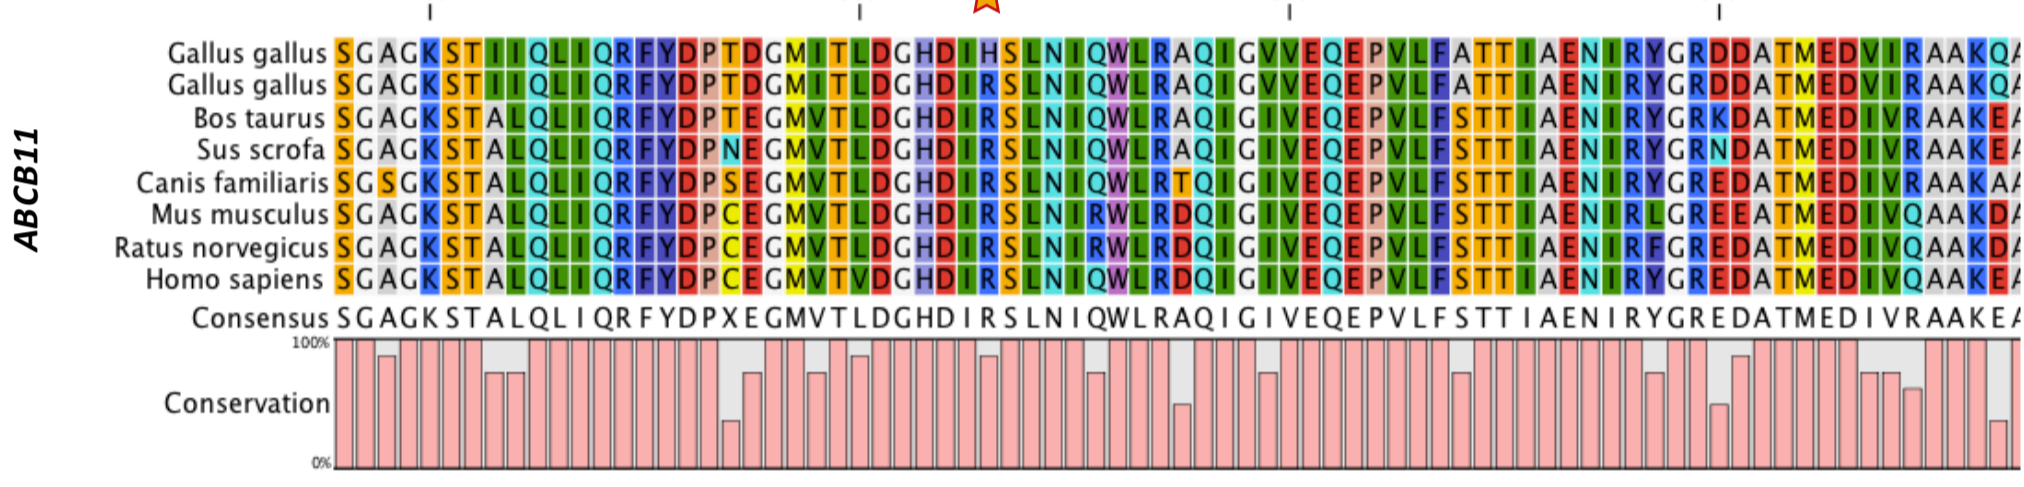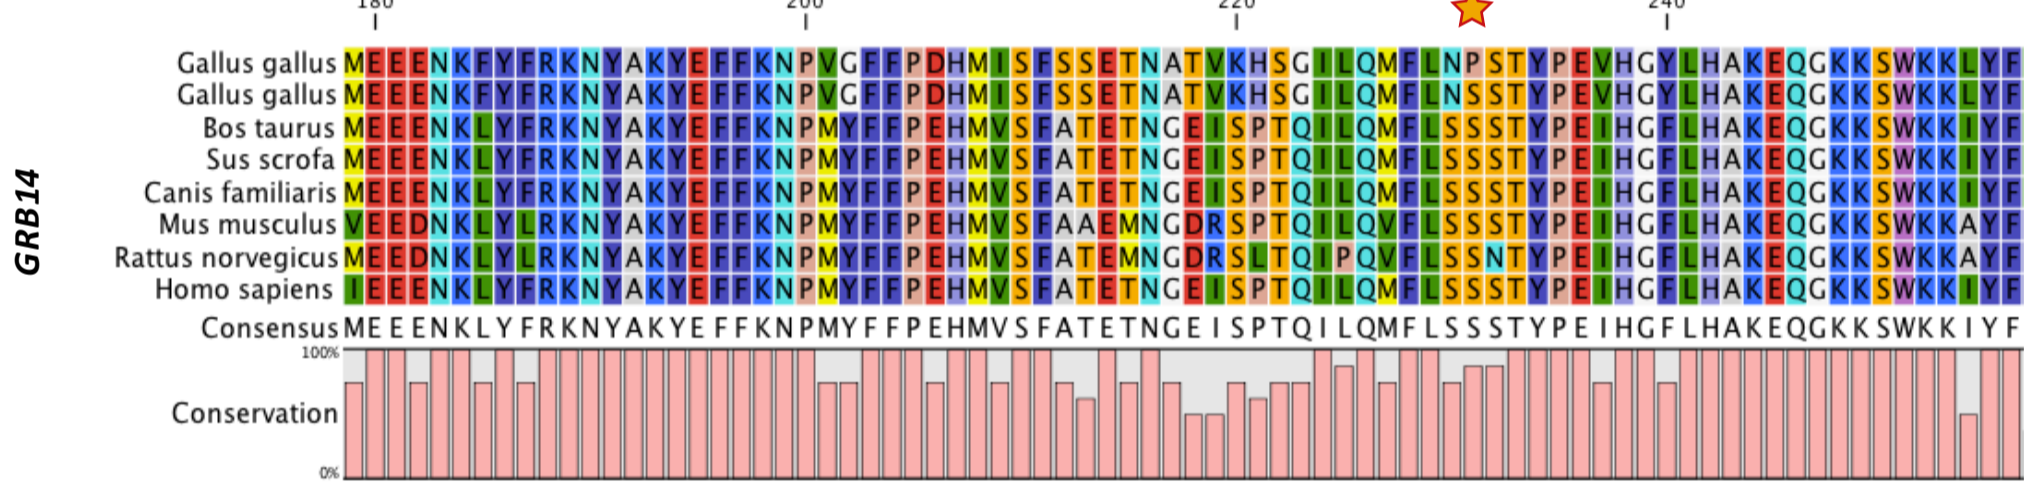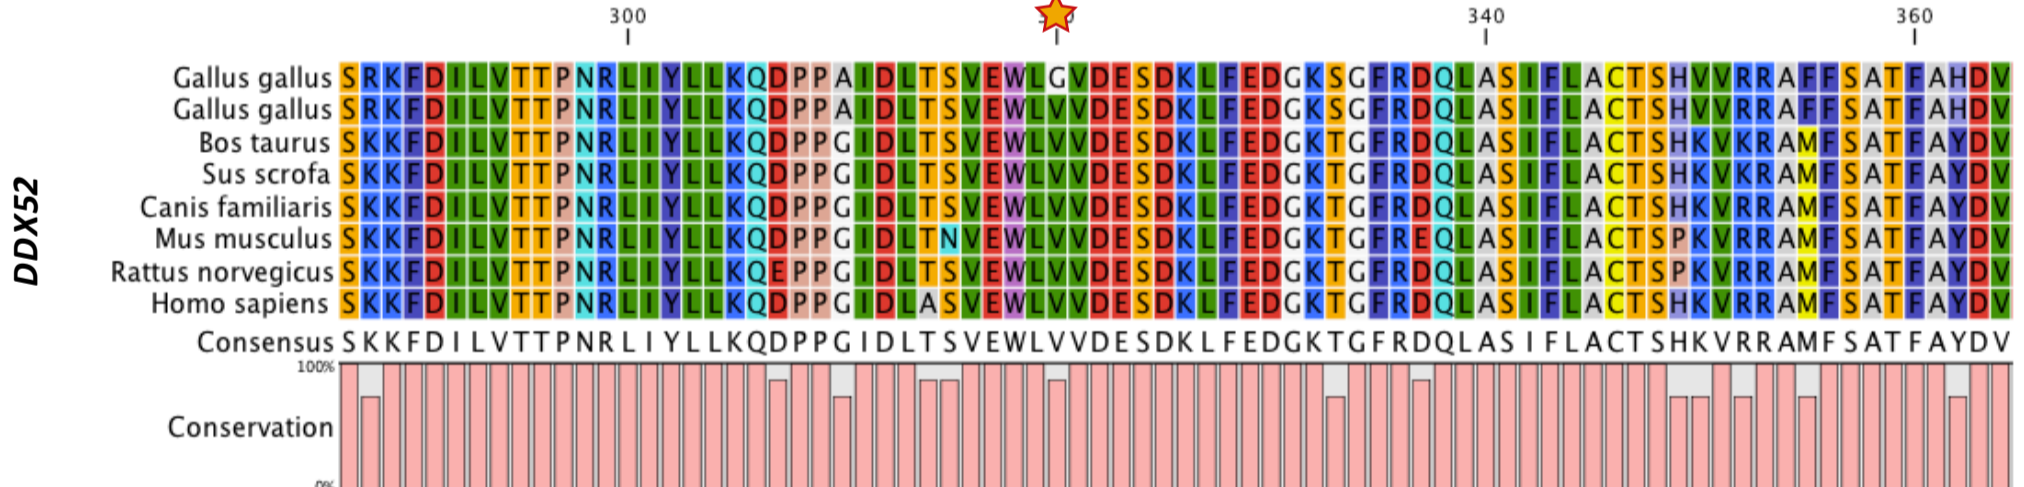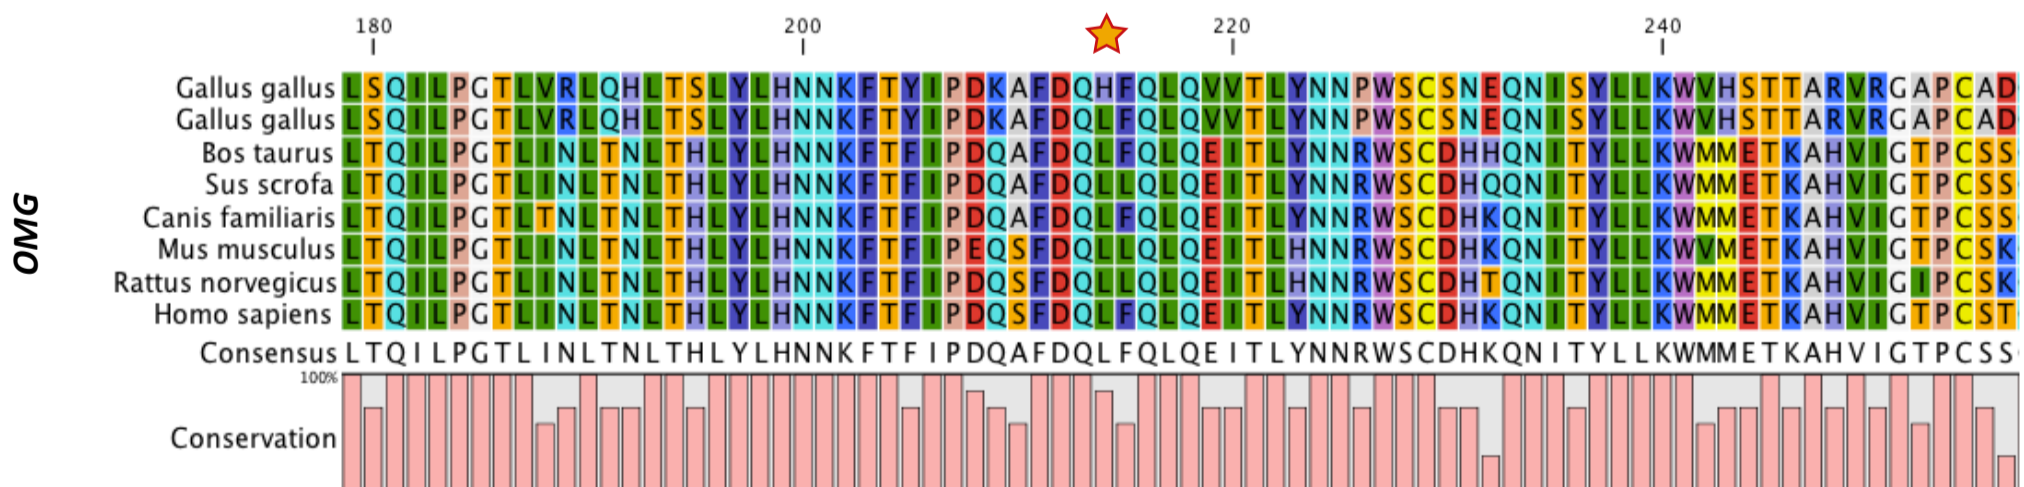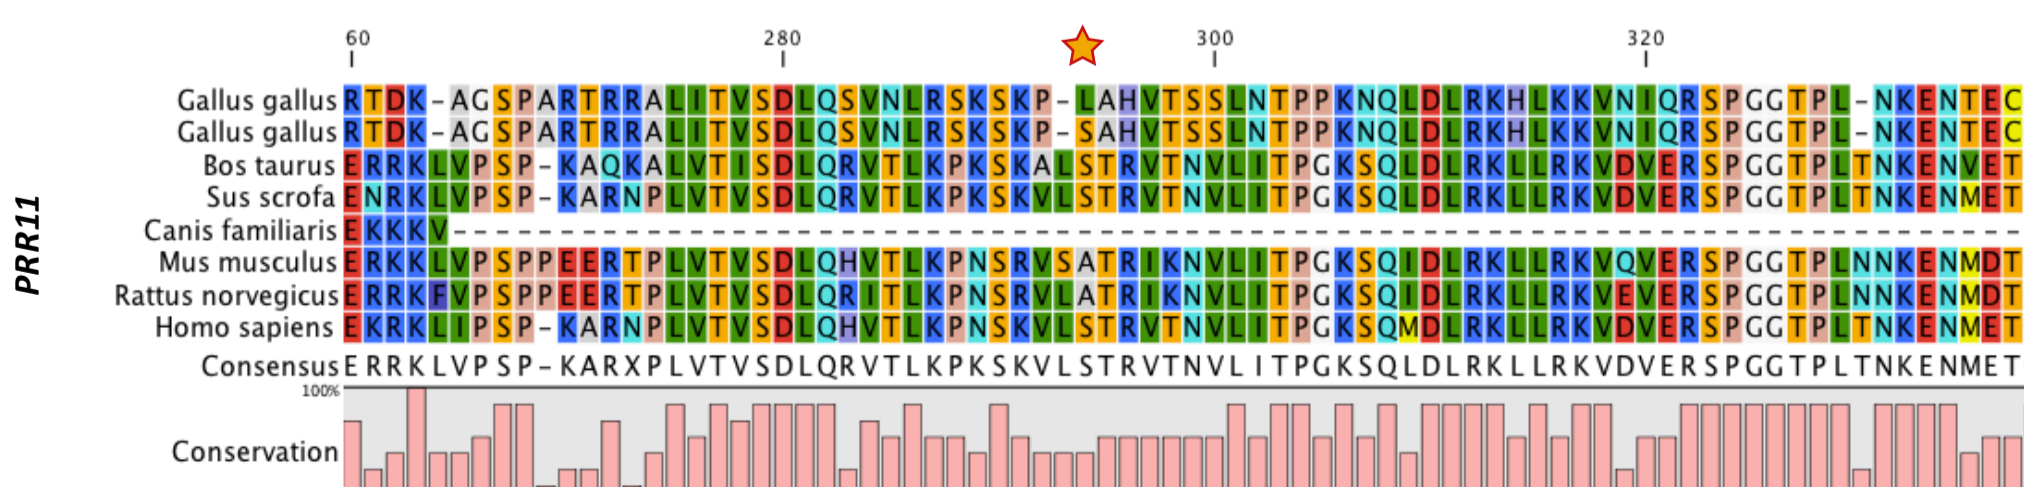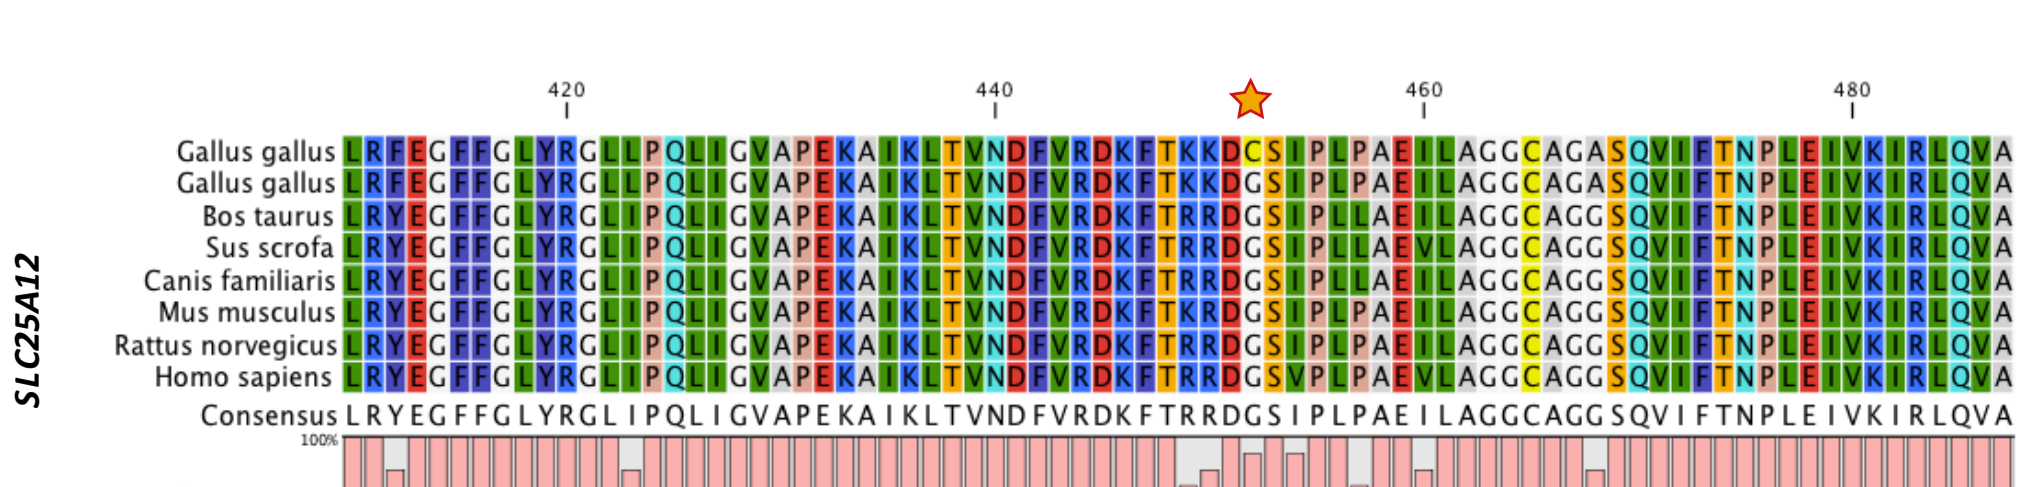

Missens SNPs
