# Supplementary material for: Re-Sequencing Data for Refining Candidate Genes and Polymorphisms in QTL Regions Affecting Adiposity in Chicken
Source: PLoS One. 2014 Oct 21;9(10):e111299. doi: 10.1371/journal.pone.0111299 (PMC4205046; doi:10.1371/journal.pone.0111299)
Supplement: Table S3 — List of primers used for Sanger sequencing validation. (XLSX) [file pone.0111299.s004.xlsx]

## Sheet: Feuil1
Table S3: List of primers used for Sanger sequencing validation.
	Chromosome	Position	Forward primer	Reverse primer	Amplicon size
SNPs	7	17688265	ACCTCTGCTAGAACCGTGTG	CCTCCAGCCACTCCCATTAG	396
	7	18394092	AGGGAGTCCTGTCCCTGAAC	TTCAAGGCACCTGTGGCAAG	276
	7	19691118	GGCTTCAGCGGTGTATTCCT	ACTTCAGAGTTCTTCCCTCTGT	283
	19	7050674	AAGAGGAGGCTTTTGGGGAG	CCTGCCAAACACGAAGAAGC	367
	19	7062733	TGAGCGACAACTCCATCACT	GTGGCCTTGCCTGGTGATAA	339
	19	7073171	AACCCTGGTGACAAAAGCCT	AGTGCAGTCTGATTAGGAAGGA	327
	19	7197846	CTCATTGCCAGAGGTGCAGT	AACACGGTTGGAAGGCAGAT	333
	19	9034557	TCAGATACTTCCCGGAACGC	TGTCTGCTGCCTTCATTCCTT	317
Indels	7	17682649	TTTCAGATCAGCCCCTTCGG	TGTGTCGGCTTTGTGTCCTT	339
	19	7197931	GCTCCTGTAGAAGTGCAGCC	AATGAACCCGGCCATGAGTG	236
	19	8995790	AAGGACGGGCAAGTTCTGTC	TGCTGCTCCCTTCGTAACTG	323
* Postion according to Ensembl Galgal4 reference
